# Supplementary material for: A putative design for the electromagnetic activation of split proteins for molecular and cellular manipulation
Source: PubMed Central journal article supplement (PMC11007078; doi:10.3389/fbioe.2024.1355915), 2024-03-28
Supplement: DataSheet1.pdf [file DataSheet1.pdf]

## Supplemental Material

### A putative design for electromagnetic activation of split proteins for molecular and cellular manipulation

#### Supplemental Figures

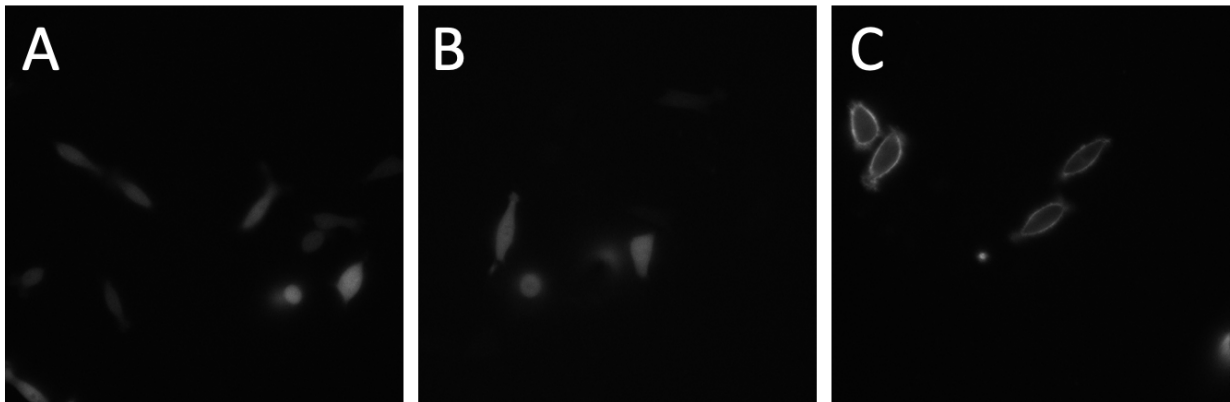

**Fig. S1. Cytoplasmic expression of EPG split NanoLuc.** Two isoforms of EPG split NanoLuc expressed in HeLa cells A) EPG split NanoLuc with a rigid linker at the N terminus and a flexible linker at the C terminus, and B) EPG split NanoLuc with a flexible linker at the N and rigid linker at the C terminus, respectively. HeLa cells transiently transfected using Lipofectamine 3000 to express the appropriate constructs were cultured on 35 mm glass-bottom dishes in DMEM containing 10% FBS under 5% CO<sub>2</sub> at 37°C. Prior to imaging, the culture medium was replaced by DMEM/F-12 without phenol red. For bioluminescence imaging, cells were incubated with 25µM Fluorofurimazine (Promega) for EPG split NanoLuc (A, B) or 50µM h-Coelenterazine (NanoLight Technology) for membrane-bound glutamate indicator (C) and imaged using an IX71 Inverted Microscope (Olympus). The microscope system was equipped with a UApo/340 40X Oil Iris objective lens (NA = 1.35) and an electron multiplying CCD (EM-CCD) iXON Ultra 888 camera (Oxford Technologies). Exposure time was set to 8 sec for all constructs. In both cases, the expression pattern of EPG split NanoLuc appeared cytoplasmic. This is in contrast to C) cells expressing a membrane-bound glutamate indicator (Petersen et al.<sup>1</sup>), whose expression pattern is limited to the cell membrane.

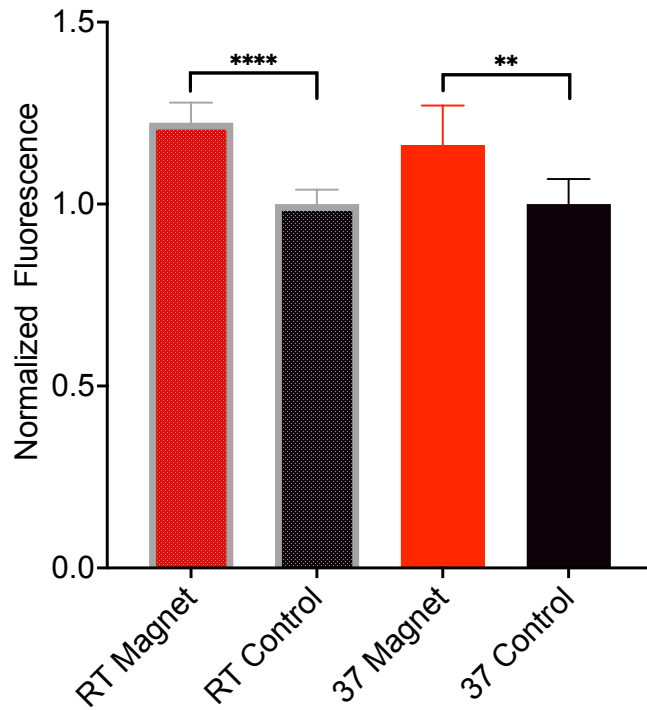

**Supplemental Figure 2: EPG split APEX2 temperature variation.**

Comparison of the EPG split APEX2 system at room temperature and 37C. Cells were either subjected to magnetic field (red) or no stimulus (black). N=8 biological replicates per group. The (\*\*) denotes p-value <0.01 and the (\*\*\*\*) denotes a p-value <0.0001.

### EPG HSVTK Linker Optimization

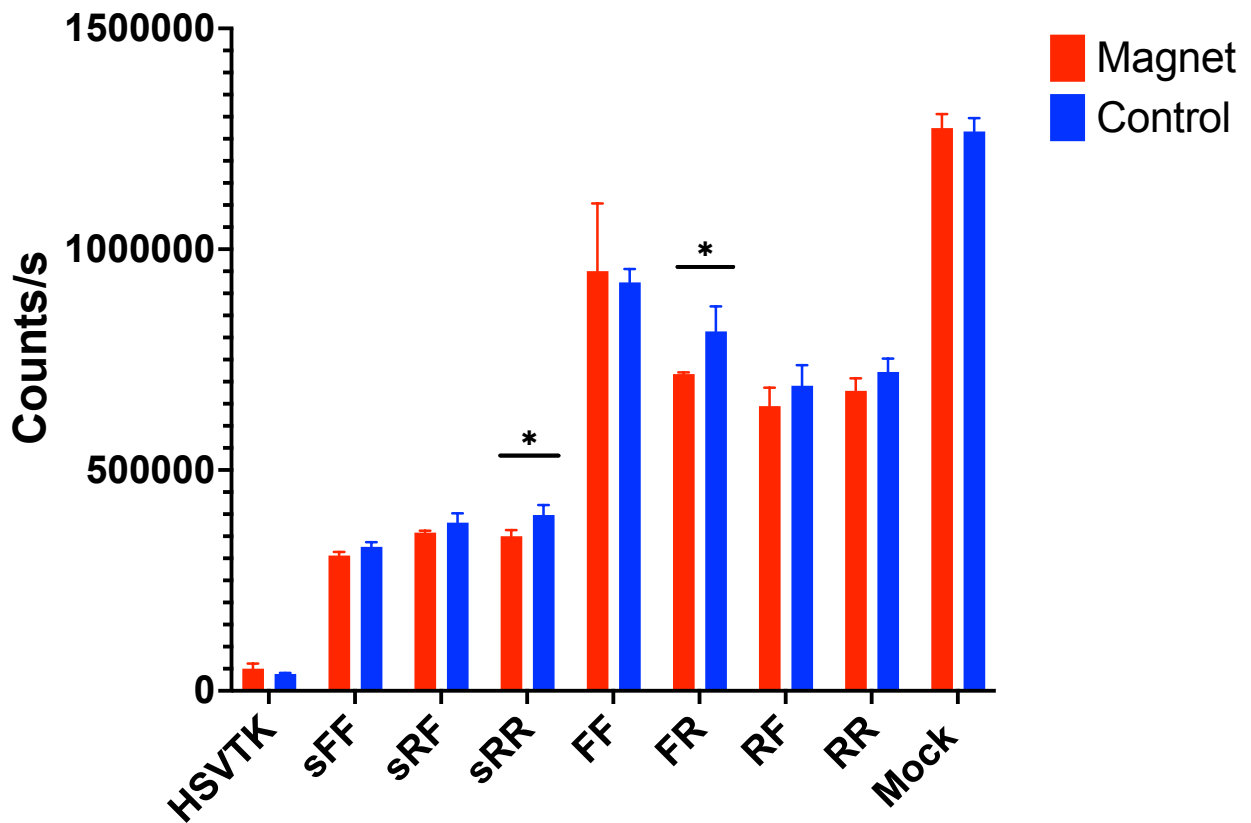

#### Supplemental Figure 3: Linker Screening of EPG-HSVTK constructs in 4T1 Cells.

Bioluminescent readouts from constructs after 72 hours of GCV treatment with and without magnetic stimulation. The lowercase “s” denotes EPG without signal sequence and membrane sequences. The capital “F” denotes a flexible linker and capital “R” denotes a rigid linker. The “\*” denotes a p-value <0.05.

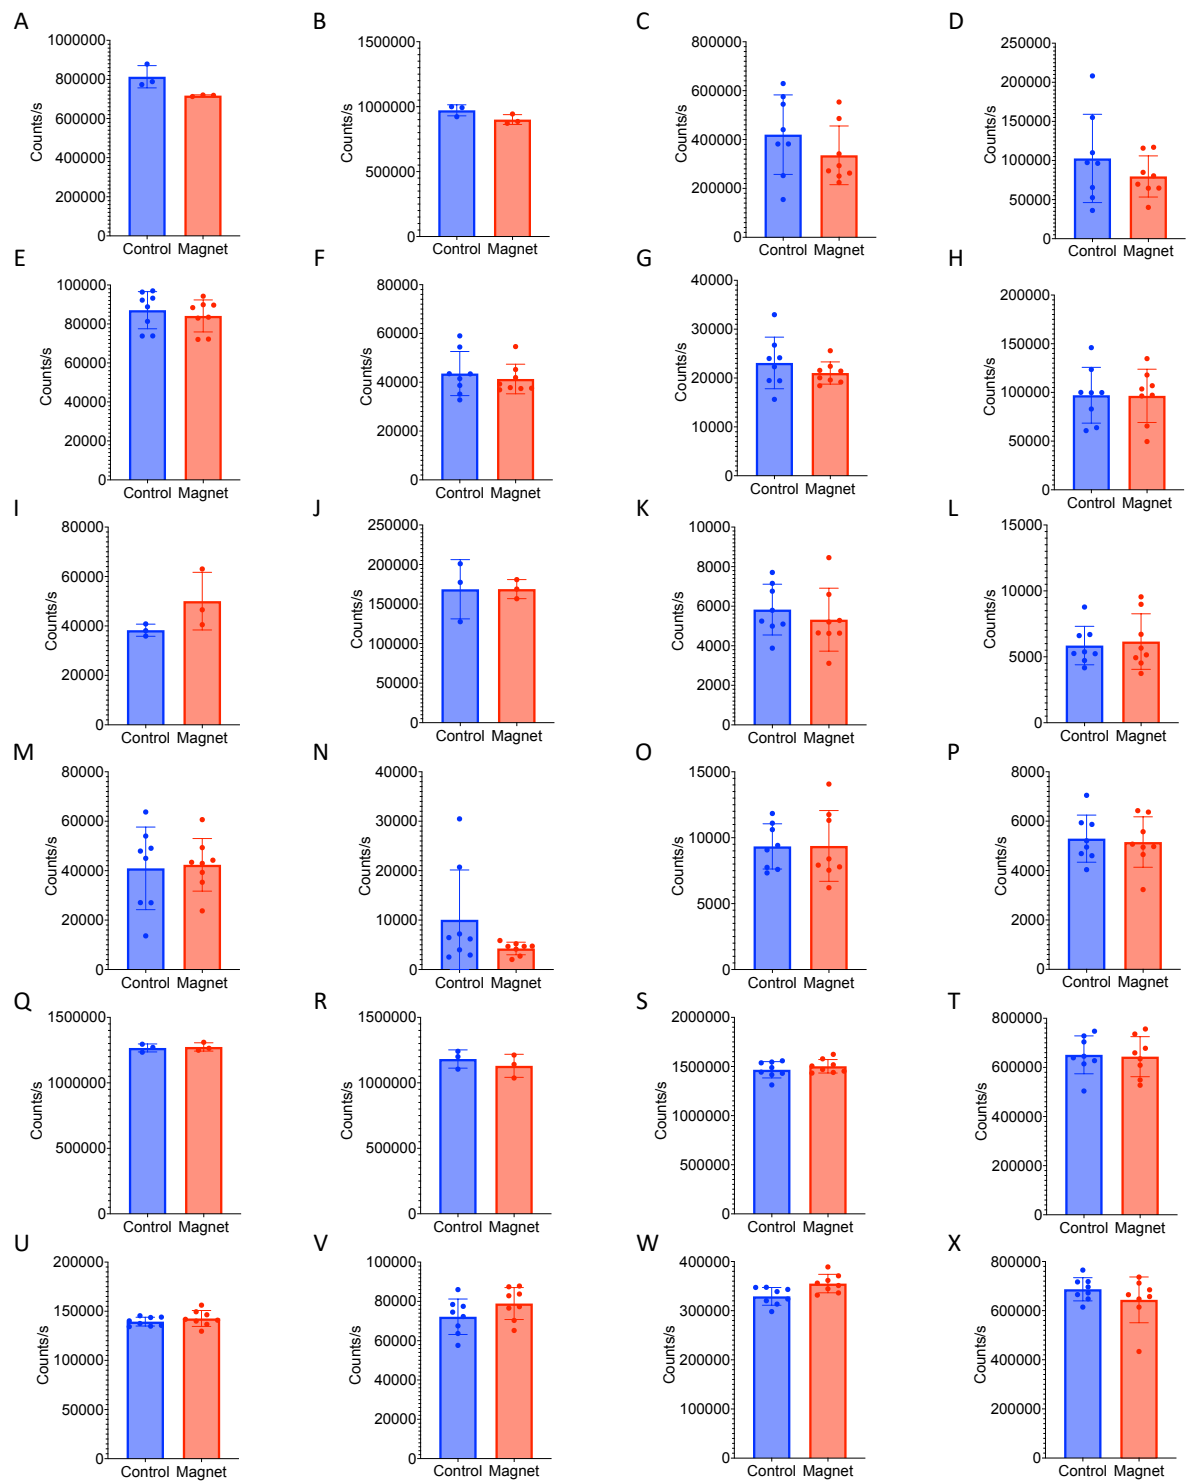

**Supplemental Figure 4: Ganciclovir mediated cell death in 4T1 cells.**

Cells expressed the EPG split HSV1-TK construct (A-H), HSV1-TK construct (I-P), or were mock transfected (Q-X) and cell viability in either a magnetic stimulated or control conditions.

## Statistical analysis of the HSV1-TK experiments:

The experiment includes 8 replicates from which we observed that the average cell growth was inhibited when under magnetic influence compared to the non-magnetic condition, and compared to each of 8 replicates of controls expecting cell growth, and cell death. There are 2 questions about the statistical significance of this observation: 1) “How likely is it to again observe the 8 replicate outcomes of reduced average cell growth if the magnetic condition actually had no effect?” 2) “How likely is it to again observe in each replicate the particular difference of averages, if the magnetic condition actually had no effect?” These can be thought of as condition and replicate significance testing, respectively.

For the condition significance testing, we investigated how likely it is to observe all 8 replicates of average cell growth showing inhibition if the experimental magnetic condition had no effect. To test this, we simulated how often we observe all 8 replicates with inhibited cell growth if we were to perform the growth and death control replicates many more times. This test is simulated because more replicate data becomes costly and laborious to gather. To simulate more control replicates we sampled our existing control replicates with replacement, counting how many samples of 8 contain all 8 showing inhibited cell growth. By chance, we observed our experimental results from the simulated sampling of the control conditions with a probability of 0.00039 (see Equation 1). This is sufficiently low to suggest significance of inhibition between replicate conditions. Probability density for the binomial distribution is shown in Equation 1, where  $n$  is the number of trials,  $p$  is the probability of success, and  $N$  is the number of successes.

$$P(N) = \binom{n}{N} p^N (1 - p)^{n-N}$$

Equation: 1. Our control conditions both have 3 replicates with average inhibited cell growth or death, and 5 replicates with invigorated cell growth or death. Assuming this outcome was the most common outcome to observe of the underlying distribution, then the probability of inhibition in the controls then becomes 3/8 or  $p=0.375$ , and  $N=8$ . Using the binomial formula yields  $P(8)=0.00039$ .

For the replicate significance testing, we investigated how likely it is to observe, for each replicate, the particular difference of means if the experimental magnetic condition had no effect and the data for both conditions had come from the same distribution. To test this, we used a Randomization Test<sup>2</sup> wherein the data comprising each replicate for both magnetic and non-magnetic conditions are assumed to originate from the same source. We randomize the “magnetic” and “non-magnetic” labels from the collected data for each replicate, then recalculate the difference of means. When performed many times (1,000,000), this process creates a distribution of differences, from which we can calculate how often the actual observed means difference or better can arise. All experimental condition replicates (EPG-HSV1-TK) showed statistical significance that the observed difference of means was far greater than

the 95% confidence interval of the mean in which the differences of the means were sampled from randomized data assuming no effect of the magnetic condition (Figures S5-S7).

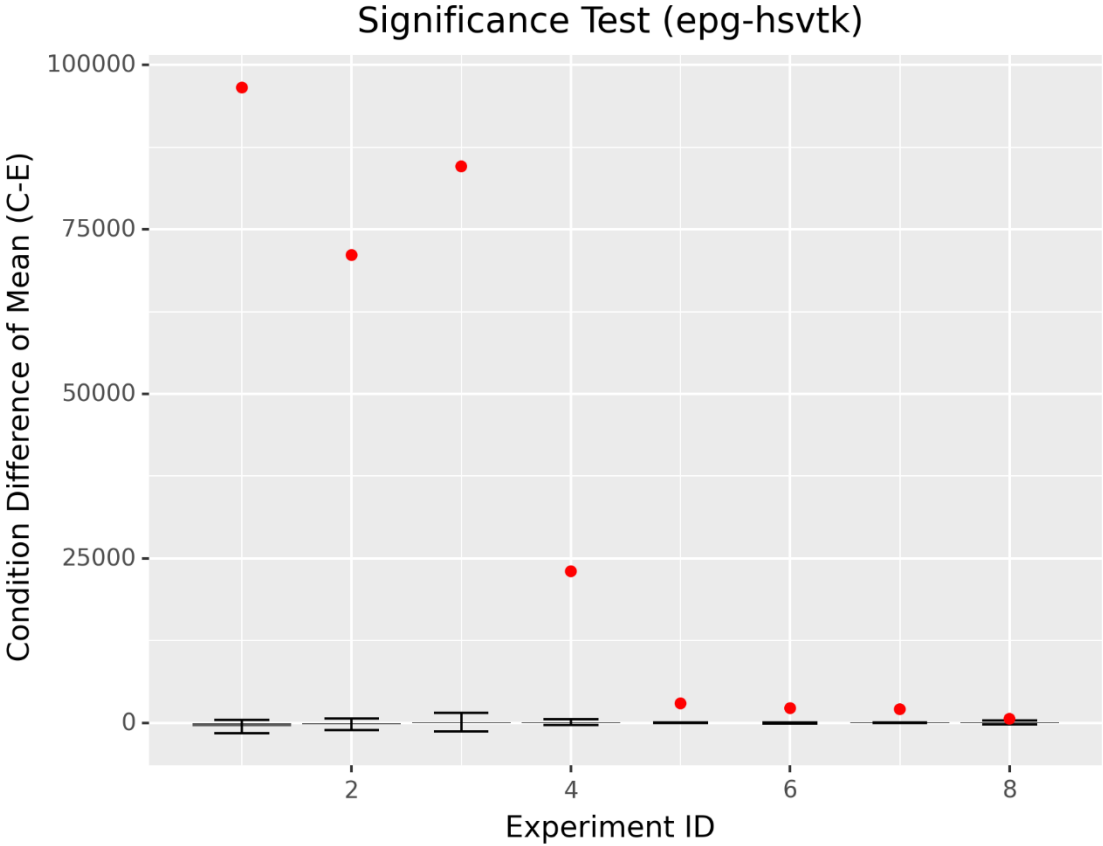

**Supplemental Figure 5: Significance Testing of EPG-HSV1-TK construct for Ganciclovir mediated cell death in 4T1 cells.** Results of 1,000,000 iterations of randomizing the labels to generate differences in the mean. Each experimental replicate was tested and showed each mean is greater than the 95% confidence interval.

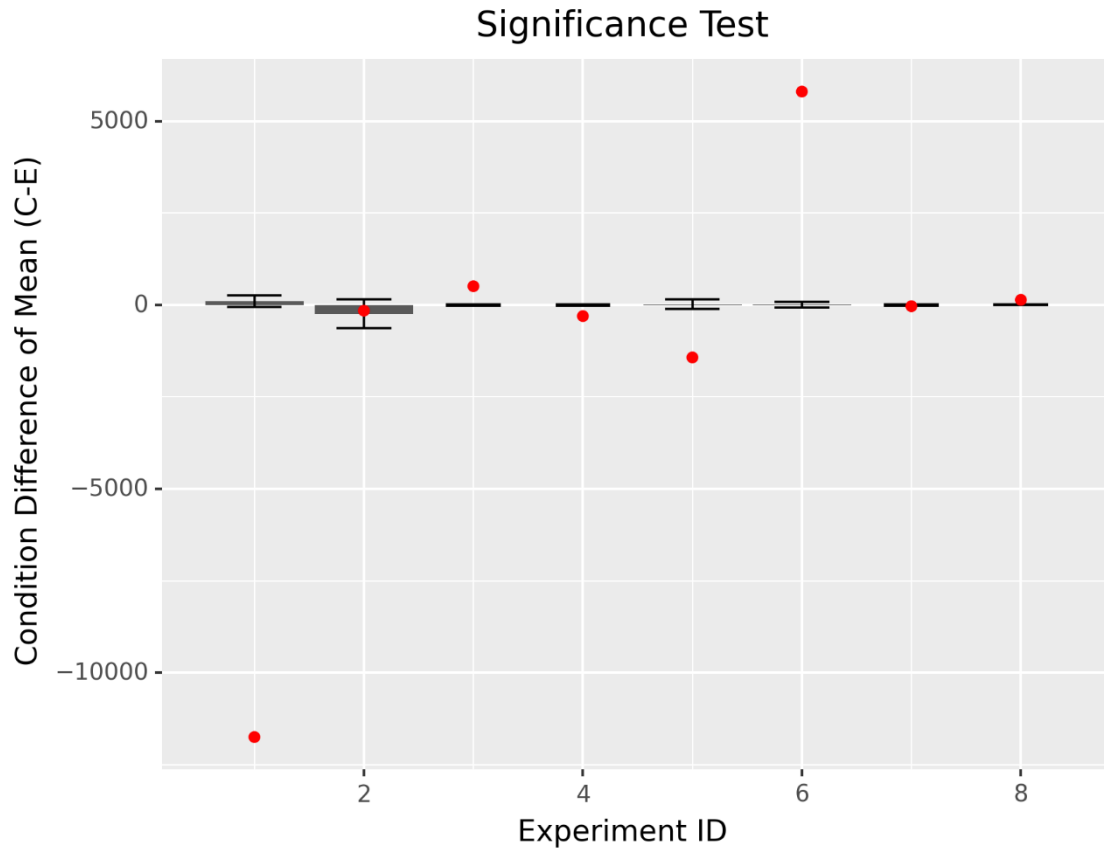

**Supplemental Figure 6: Significance Testing of HSV1-TK construct for Ganciclovir mediated cell death in 4T1 cells.** Results of 1,000,000 iterations of randomizing the labels to generate differences in the mean. Each experimental replicate was tested and did not show consistent difference in means.

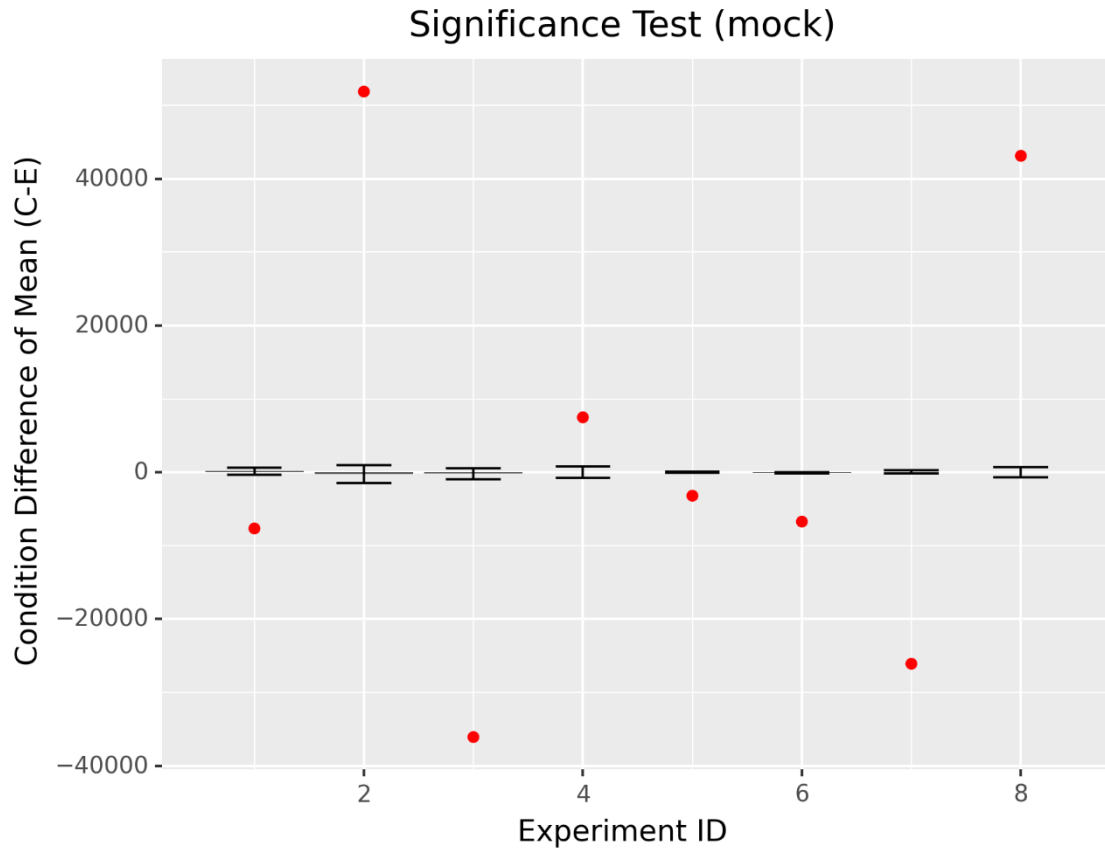

**Supplemental Figure 7: Significance Testing of Mock transfected cells for Ganciclovir mediated cell death in 4T1 cells.** Results of 1,000,000 iterations of randomizing the labels to generate differences in the mean. Each experimental replicate was tested and did not show consistent difference in means.



## Constructs

### EPG BRET Constructs

**EPG BRET- Vector:** pcDNA 3.1 Promoter: CMV

Start-NanoLuc-EPG-mVenus-Stop

```
ATGGTCTTCACACTCGAAGATTTTCGTTGGGGACTGGCGACAGACAGCCGGCTACAACCTGGACCAAGTCC
TTGAACAGGGAGGTGTGTCCAGTTTGTTCAGAATCTCGGGGTGTCCGTAACCTCCGATCCAAAGGATTGT
CCTGAGCGGTGAAAATGGGCTGAAGATCGACATCCATGTCATCATCCCGTATGAAGGTCTGAGCGGCGAC
CAAATGGGCCAGATCGAAAAAATTTTAAGGTGGTGTACCCTGTGGATGATCATCACTTTAAGGTGATCC
TGCACTATGGCACACTGGTAATCGACGGGGTTACGCCGAACATGATCGACTATTTCCGACGGCCGTATGA
AGGCATCGCCGTGTTTCGACGGCAAAAAGATCACTGTAACAGGGACCCTGTGGAACGGCAACAAAATTATC
GACGAGCGCCTGATCAACCCCGACGGCTCCCTGCTGTTCCGAGTAACCATCAACGGAGTGACCGGCTGGC
GGCTGTGCGAACGCATTCTGGCGATGAAGTGTGTACTTTTGGGATTTCGACGAGTGATCGGATTCTTCGC
GATCGCGGAGTCTCTTACCTGTAACACATGCTCAGTGAGTCTGATTGGAATATGTCTGAATCCCGCAACA
GCGACTTGCTCCACCAACACATCCGTCTGCACCACAGGAAGAGCCAGTTTCACGGGCGTCCCTCGGCTTCC
TGGGCTTCAACTCCCAGGGCTGCACGGAGGGAGCTCAGTGTAAATGGCACCGTGTCCGGGTCCATCCTGGG
TGCGTCGTACACGGTCACTCAAACCTGCTGCAGCACAAACAACCTGCAACCCCGTGACCAGCGGCGCCTCC
TACGTCCAGATCTCCGTACGCGCGGCCCTGAGCGCCGCCCTGCTGGCCTGCGTCTGGGGCCAGTCCGTCT
ACATGGTGAGCAAGGGCGAGGAGCTGTTACCCGGGGTGGTGCCCATCCTGGTCGAGCTGGACGGCGACGT
AAACGGCCACAAGTTCAGCGTGTCCGGCGAGGGCGAGGGCGATGCCACCTACGGCAAGCTGACCCTGAAG
CTGATCTGCACCACCGGAAGCTGCCCGTGGCCACCCTCGTGACCACCCTGGGCTACGGCCTGC
AGTGCTTCGCCCGTACCCCGACCACATGAAGCAGCACGACTTCTTCAAGTCCGCCATGCCCGAAGGCTA
CGTCCAGGAGCGCACCATCTTCTTCAAGGACGACGGCAACTACAAGACCCGCGCCGAGGTGAAGTTCGAG
GGCGACACCCTGGTGAACCGCATCGAGCTGAAGGGCATCGACTTCAAGGAGGACGGCAACATCCTGGGGC
ACAAGCTGGAGTACAACACAACAGCCACAACGTCTATATCACCCGCCACAAGCAGAAGAACGGCATCAA
GGCCAACTTCAAGATCCGCCACAACATCGAGGACGGCGCGCTGCAGCTCGCCGACCACTACCAGCAGAAC
ACCCCATCGGCGACGGCCCCGTGCTGCTGCCCGACAACCACTACCTGAGTACCAGTCCGCCCTGAGCA
AAGACCCCAACGAGAAGCGCGATCACATGGTCTGCTGGAGTTCGTGACCGCCGCGGGATCACTCTCGG
CATGGACGAGCTGTACAAGTAA
```

**Tandem EPG BRET- Vector:** pcDNA 3.1 Promoter: CMV

Start-NanoLuc-EPG-EPG-mVenus-Stop

```
ATGGTCTTCACACTCGAAGATTTTCGTTGGGGACTGGCGACAGACAGCCGGCTACAACCTGGACCAAGTCC
TTGAACAGGGAGGTGTGTCCAGTTTGTTCAGAATCTCGGGGTGTCCGTAACCTCCGATCCAAAGGATTGT
CCTGAGCGGTGAAAATGGGCTGAAGATCGACATCCATGTCATCATCCCGTATGAAGGTCTGAGCGGCGAC
CAAATGGGCCAGATCGAAAAAATTTTAAGGTGGTGTACCCTGTGGATGATCATCACTTTAAGGTGATCC
TGCACTATGGCACACTGGTAATCGACGGGGTTACGCCGAACATGATCGACTATTTCCGACGGCCGTATGA
AGGCATCGCCGTGTTTCGACGGCAAAAAGATCACTGTAACAGGGACCCTGTGGAACGGCAACAAAATTATC
GACGAGCGCCTGATCAACCCCGACGGCTCCCTGCTGTTCCGAGTAACCATCAACGGAGTGACCGGCTGGC
GGCTGTGCGAACGCATTCTGGCGATGAAGTGTGTACTTTTGGGATTTCGACGAGTGATCGGATTCTTCGC
GATCGCGGAGTCTCTTACCTGTAACACATGCTCAGTGAGTCTGATTGGAATATGTCTGAATCCCGCAACA
GCGACTTGCTCCACCAACACATCCGTCTGCACCACAGGAAGAGCCAGTTTCACGGGCGTCCCTCGGCTTCC
TGGGCTTCAACTCCCAGGGCTGCACGGAGGGAGCTCAGTGTAAATGGCACCGTGTCCGGGTCCATCCTGGG
TGCGTCGTACACGGTCACTCAAACCTGCTGCAGCACAAACAACCTGCAACCCCGTGACCAGCGGCGCCTCC
TACGTCCAGATCTCCGTACGCGCGGCCCTGAGCGCCGCCCTGCTGGCCTGCGTCTGGGGCCAGTCCGTCT
```

ACATGAAGTGTGTACTTTTGGGATTTCGCAGCAGTGATCGGATTCTTCGCGATCGCGGAGTCTCTTACCTG  
TAACACATGCTCAGTGAGTCTGATTGGAATATGTCTGAATCCCGCAACAGCGACTTGCTCCACCAACACA  
TCCGTCTGCACCACAGGAAGAGCCAGTTTACGGGCGTCTCGGCTTCTGGGCTTCAACTCCCAGGGCT  
GCACGGAGGGAGCTCAGTGTAATGGCACCGTGTCCGGGTCCATCCTGGGTGCGTCGTACACGGTCACTCA  
AACCTGCTGCAGCACAACAACCTGCAACCCCGTGACCAGCGGCGCCTCCTACGTCCAGATCTCCGTGAGC  
GCGGCCCTGAGCGCCGCCCTGCTGGCCTGCGTCTGGGGCCAGTCCGTCTACATGGTGAGCAAGGGCGAGG  
AGCTGTTACCCGGGGTGGTGCCCATCTGGTTCGAGCTGGACGGCGACGTAACCGGCCACAAGTTCAGCGT  
GTCCGGCGAGGGCGAGGGCGATGCCACCTACGGCAAGCTGACCCTGAAGCTGATCTGCACCACCGGCAAG  
CTGCCCGTGCCTGGCCACCCTCGTGACCACCCTGGGCTACGGCCTGCAGTGCTTCGCCCGCTACCCCG  
ACCACATGAAGCAGCAGACTTCTTCAAGTCCGCCATGCCCGAAGGCTACGTCCAGGAGCGCACCATCTT  
CTTCAAGGACGACGGCAACTACAAGACCCGCGCCGAGGTGAAGTTCGAGGGCGACACCCTGGTGAACCGC  
ATCGAGCTGAAGGGCATCGACTTCAAGGAGGACGGCAACATCCTGGGGCACAAGCTGGAGTACAACATA  
ACAGCCACAACGTCTATATCACCGCCGACAAGCAGAAGAACGGCATCAAGGCCAACTTCAAGATCCGCCA  
CAACATCGAGGACGGCGGCGTGCAGCTCGCCGACCACTACCAGCAGAACACCCCATCGGCGACGGCCCC  
GTGCTGCTGCCCGACAACCACTACCTGAGCTACCAGTCCGCCCTGAGCAAAGACCCCAACGAGAAGCGCG  
ATCACATGGTCTGCTGGAGTTCGTGACCGCCGCCGGGATCACTCTCGGCATGGACGAGCTGTACAAGTA  
A

**EPG IRES BRET- Vector:** pcDNA 3.1 Promoter: CMV

Start- EPG-NanoLuc-IRES-EPG-mVenus-Stop

ATGAAGTGTGTACTTTTGGGATTTCGCAGCAGTGATCGGATTCTTCGCGATCGCGGAGTCTCTTACCTGTA  
ACACATGCTCAGTGAGTCTGATTGGAATATGTCTGAATCCCGCAACAGCGACTTGCTCCACCAACACATC  
CGTCTGCACCACAGGAAGAGCCAGTTTACGGGCGTCTCGGCTTCTGGGCTTCAACTCCCAGGGCTGC  
ACGGAGGGAGCTCAGTGTAATGGCACCGTGTCCGGGTCCATCCTGGGTGCGTCGTACACGGTCACTCAA  
CCTGCTGCAGCACAACAACCTGCAACCCCGTGACCAGCGGCGCCTCCTACGTCCAGATCTCCGTGAGCGC  
GGCCCTGAGCGCCGCCCTGCTGGCCTGCGTCTGGGGCCAGTCCGTCTACATGGTCTTACACTCGAAGAT  
TTCGTTGGGGACTGGCGACAGACAGCCGGCTACAACCTGGACCAAGTCTTGAACAGGGAGGTGTGTCCA  
GTTTGTTCAGAATCTCGGGGTGTCCGTAACCTCCGATCCAAAGGATTGTCTGAGCGGTGAAAATGGGCT  
GAAGATCGACATCCATGTATCATCCCGTATGAAGGTCTGAGCGGCGACCAAATGGGCCAGATCGAAAA  
ATTTTTAAGGTGGTGTACCCTGTGGATGATCATCACTTTAAGGTGATCCTGCACTATGGCACACTGGTAA  
TCGACGGGGTTACGCCGAACATGATCGACTATTTCCGACGGCCGTATGAAGGCATCGCCGTGTTGACGG  
CAAAAAGATCACTGTAACAGGGACCCTGTGGAACGGCAACAAAATTATCGACGAGCGCCTGATCAACCC  
GACGGCTCCCTGCTGTTCCGAGTAACCATCAACGGAGTGACCGGCTGGCGGCTGTGCGAACGCATTCTGG  
CCCCCTCTCCCTCCCCCCCCCTAACGTTACTGGCCGAAGCCGCTTGAATAAAGGCCGGTGTGCGTTTGT  
CTATATGTTATTTTCCACCATATTGCCGTCTTTTGGCAATGTGAGGGCCCGGAAACCTGGCCCTGTCTTC  
TTGACGAGCATTCTAGGGGTCTTTCCCTCTCGCCAAAGGAATGCAAGGTCTGTTGAATGTCGTGAAGG  
AAGCAGTTCCTCTGGAAGCTTCTTGAAGACAAACAACGTCTGTAGCGACCCTTTCAGGCAGCGGAACCC  
CCCACCTGGCGACAGGTGCCTCTGCGGCCAAAAGCCACGTGTATAAGATACACCTGCAAAGGCGGCACAA  
CCCCAGTGCCACGTTGTGAGTTGGATAGTTGTGGAAGAGTCAAATGGCTCTCCTCAAGCGTATTCAACA  
AGGGGCTGAAGGATGCCAGAAGGTACCCATTGTATGGGATCTGATCTGGGGCCTCGGTGCACATGCTT  
TACATGTGTTTAGTCGAGGTTAAAAACGTCTAGGCCCCCCGAACCACGGGGACGTGGTTTTCTTTGAA  
AAACACGATGATAATGGCCACAACCATGAAGTGTGTACTTTTGGGATTTCGCAGCAGTGATCGGATTCTTC  
GCGATCGCGGAGTCTTACCTGTAACACATGCTCAGTGAGTCTGATTGGAATATGTCTGAATCCCGCAA  
CAGCGACTTGCTCCACCAACACATCCGTCTGCACCACAGGAAGAGCCAGTTTACGGGCGTCTCGGCTT  
CCTGGGCTTCAACTCCCAGGGCTGCACGGAGGGAGCTCAGTGTAATGGCACCGTGTCCGGGTCCATCCTG

GGTGCGTCGTACACGGTCACTCAAACCTGCTGCAGCACAAACAACCTGCAACCCCGTGACCAGCGGGCGCCT  
CCTACGTCCAGATCTCCGTGAGCGCGGCCCTGAGCGCCGCCCTGCTGGCCTGCGTCTGGGGCCAGTCCGT  
CTACATGGTGAGCAAGGGCGAGGAGCTGTTACCGGGGTGGTGCCATCCTGGTCGAGCTGGACGGCGAC  
GTAAACGGCCACAAGTTCAGCGTGTCCGGCGAGGGCGAGGGCGATGCCACCTACGGCAAGCTGACCCTGA  
AGCTGATCTGCACCACCGCAAGCTGCCCGTGGCCACCCTCGTGACCACCCTGGGCTACGGCCT  
GCAGTGCTTCGCCCGTACCCCGACCACATGAAGCAGCAGACTTCTTCAAGTCCGCCATGCCCGAAGGC  
TACGTCCAGGAGCGCACCATCTTCTTCAAGGACGACGGCAACTACAAGACCCGCGCCGAGGTGAAGTTCCG  
AGGGCGACACCCTGGTGAACCGCATCGAGCTGAAGGGCATCGACTTCAAGGAGGACGGCAACATCCTGGG  
GCACAAGCTGGAGTACAACATAACAGCCACAACGTCTATATCACCGCCGACAAGCAGAAGAACGGCATC  
AAGGCCAACTTCAAGATCCGCCACAACATCGAGGACGGCGGGTGCAGCTCGCCGACCACTACCAGCAGA  
ACACCCCATCGGCGACGGCCCCGTGCTGCTGCCCGACAACCACTACCTGAGCTACCAGTCCGCCCTGAG  
CAAAGACCCCAACGAGAAGCGCGATCACATGGTCTGCTGGAGTTCGTGACCGCCGCCGGATCACTCTC  
GGCATGGACGAGCTGTACAAGTAA

**EPG split NanoLuc- Vector:** pET101 Promoter: T7laq

Start-N-Terminal NanoLuc-3AA Linker-EPG-3AA Linker-C-Terminal NanoLuc-Stop

ATGGTCTTCACACTCGAAGATTTTCGTTGGGGACTGGCGACAGACAGCCGGCTACAACCTGGACCAAGTCC  
TTGAACAGGGAGGTGTGTCCAGTTTGTTCAGAATCTCGGGGTGTCCGTAACCTCCGATCCAAAGGATTGT  
CCTGAGCGGTGAAAATGGGCTGAAGATCGACATCCATGTCATCATCCCGTATGAGGAGGTAGTAAAGTGTG  
TACTTTTGGGATTCGCAGCAGTGATCGGATTCCTCGCGATCGCGGAGTCTTACCTGTAACACATGCTC  
AGTGAGTCTGATTGGAATATGTCTGAATCCCGCAACAGCGACTTGCTCCACCAACACATCCGTCTGCACC  
ACAGGAAGAGCCAGTTTACGGGCGTCTCGGCTTCCCTGGGCTTCAACTCCAGGGCTGCACGGAGGGAG  
CTCAGTGTAATGGCACCCTGTCCGGTCCATCCTGGGTGCGTGTACACGGTCACTCAAACCTGCTGCAG  
CACAAACAACCTGCAACCCCGTGACCAGCGGCGCCTCCTACGTCCAGATCTCCGTGAGCGCGGCCCTGAGC  
GCCGCCCTGCTGGCCTGCGTCTGGGGCCAGTCCGTCTACGGAGGTAGTGGTCTGAGCGGGACCAAATGG  
GCCAGATCGAAAAAATTTTAAAGTGGTGTACCCTGTGGATGATCATCACTTTAAGGTGATCCTGCACTA  
TGGCACTGGTAATCGACGGGGTTACGCCGAACATGATCGACTATTTCCGACGGCCGTATGAAGGCATC  
GCCGTGTTGACGGCAAAAAGATCACTGTAACAGGGACCCTGTGGAACGGCAACAAAATTATCGACGAGC  
GCCTGATCAACCCCGACGGCTCCCTGCTGTTCCGAGTAACCATCAACGGAGTGACCGGCTGGCGGCTGTG  
CGAACGCATTCTGGCGTAA

**EPG-HaloTag- Vector:** pcDNA 3.1 Promoter: CMV

EPG Signal sequence-HaloTag-Linker-TEV site-Linker-EPG-3xFLAG

ATGAAGTGTGTACTTTTGGGATTCGACGAGTATCGGATTCCTCGCGATCGCGGAGTCTATGGCAGAAA  
TCGGTACTGGCTTTCCATTTCGACCCCAATTATGTGGAAGTCTGGGCGAGCGCATGCACTACGTGATGT  
TGGTCCGCGGATGGCACCCTGTGCTGTTCTGCACGGTAACCCGACCTCCTCCTACGTGTGGCGCAAC  
ATCATCCCGCATGTTGCACCGACCCATCGCTGCATTGCTCCAGACCTGATCGGTATGGGCAAATCCGACA  
AACCAGACCTGGGTTATTTCTTCGACGACCACGTCCGCTTCATGGATGCCTTCATCGAAGCCCTGGGTCT  
GGAAGAGGTCGTCCTGGTCATTCACGACTGGGGCTCCGCTCTGGGTTTCCACTGGGCCAAGCGCAATCCA  
GAGCGCGTCAAAGGTATTGCATTTATGGAGTTCATCCGCCCTATCCCGACCTGGGACGAATGGCCAGAAT  
TTGCCCGGAGACCTTCCAGGCCTTCCGCACCACCGACGTGGCCGCAAGCTGATCATCGATCAGAACGT  
TTTTATCGAGGGTACGCTGCCGATGGGTGTGCTCCGCCCGCTGACTGAAGTCGAGATGGACCATTACCGC  
GAGCCGTTCTGAATCCTGTTGACCGCGAGCCACTGTGGCGCTTCCCAAACGAGCTGCCAATCGCCGGTG  
AGCCAGCGAACATCGTCGCGCTGGTCTGAAGAATACATGGACTGGCTGCACCAGTCCCCTGTCCCGAAGCT  
GCTGTTCTGGGGCACCCAGGCGTTCGTATCCACCGGCCGAAGCCGCTCGCTGGCCAAAAGCCTGCCT

AACTGCAAGGCTGTGGACATCGGCCCGGGTCTGAATCTGCTGCAAGAAGACAACCCGGACCTGATCGGCA  
GCGAGATCGCGCGCTGGCTGTGACGCTCGAGATTTCCGGCGAGCCAACCACTGAGGATCTGTACTTTCA  
GAGCGATAACCTTACCTGTAACACATGCTCAGTGAGTCTGATTGGAATATGTCTGAATCCCGCAACAGCG  
ACTTGCTCCACCAACACATCCGTCTGCACCACAGGAAGAGCCAGTTTCACGGGCGTCTCGGCTTCCTGG  
GCTTCAACTCCCAGGGCTGCACGGAGGGAGCTCAGTGTAATGGCACCGTGTCCGGGTCCATCCTGGGTGC  
GTCGTACACGGTCACTCAAACCTGCTGCAGCACAACAACCTGCAACCCCGTGACCAGCGGCGCCTCCTAC  
GTCCAGATCTCCGTGAGCGCGGCCCTGAGCGCCGCCCTGCTGGCCTGCGTCTGGGGCCAGTCCGTCTACG  
ACTACAAGGATGACGATGACAAGGATTACAAAGACGACGATGATAAGGACTATAAGGATGATGACGACAA  
A

**EPG Split APEX2** Vector: pcDNA 3.1 Promoter: CMV

Start-AP Fragment-Linker-EPG-Linker-EX Fragment-Stop

ATGGGGAAATCATACCCAACAGTGTCCGCAGACTACCAGGATGCCGTGGAGAAAGCCAAGAAGAGGCTGG  
GAGGGTTTATCGCAGAAAAGAGGTGCGCACCTCTGATGCTGAGACTGGCTTTCCACAGCGCAGGCACCTT  
TGACAAGAGAACCAAAACAGGCGGACCCCTTTGGAACAATCAGGTACCCCGCTGAACTGGCACATAGTGCC  
AACAGCGGGCTGGACATCGCCGTGCGGCTGCTGGAACCTCTGAAAGCAGAGTTCCCAATTCTGTCCTACG  
CCGATTTTTATCAGCTGGCAGGAGTGGTCGCTGTGGAGGTCACTGGGGGCCCAAGGTGCCTTTTCACCC  
AGGACGGGAGGACAAGCCAGAACTACCTCCAGAGGGGCGCCTGCCAGATCCGACAAAGGGCTCCGACCAT  
CTGCGAGATGTGTTTGGGAAAGCTATGGGCCTGACTGACCAGGATATCGTCGCACTGTCTGGAGGGCACA  
CCCTTGGCGCCGCTCATAAGGAAAGGTCAAGGCTTCGAGGGACCCCTGGACAAGCAACCCCTGGTTTTCGA  
CAATTCTTACTTTACTGAACTGCTGAGTGGAGAGAAGGAAAGGGGCTCGGGCTCGACCTCGAAGTGTGTA  
CTTTTGGGATTCGCAGCAGTGATCGGATTCCTCGCGATCGCGGAGTCTCTTACCTGTAACACATGCTCAG  
TGAGTCTGATTGGAATATGTCTGAATCCCGCAACAGCGACTTGCTCCACCAACACATCCGTCTGCACCAC  
AGGAAGAGCCAGTTTCACGGGCGTCTCGGCTTCCTGGGCTTCAACTCCCAGGGCTGCACGGAGGGAGCT  
CAGTGTAATGGCACCGTGTCCGGGTCCATCCTGGGTGCGTCGTACACGGTCACTCAAACCTGCTGCAGCA  
CAAACAACCTGCAACCCCGTGACCAGCGGCGCCTCCTACGTCCAGATCTCCGTGAGCGCGGCCCTGAGCGC  
CGCCCTGCTGGCCTGCGTCTGGGGCCAGTCCGTCTACGGATCCAAGGGCTCGGGCTCGACCTCGGGCTCG  
GGCGGGCTGCTGCAGCTGCCAGCGACAAGCCCTGCTGTCCGATCCCGTGTTTCAGACCTCTGGTCGATA  
AGTATGCAGCCGACGAGGATGCTTTTTTCGAGATTACGCAGAAGCACATCAGAAGCTGTCAGAAGTGGG  
ATTTGCCGACGCC TAA

**EPG Split HSVTK** Vector: pTwist CMV Puro Promoter: CMV

Start-N-Terminal HSV-TK-Linker-EPG-Linker-C-Terminal HSV-TK-Stop

ATGGCCTTGACGCCCCAGGGTGCCGAGCCCCAGAGCAACGCGGGCCCACGACCCCATATCGGGGAAACGT  
TATTTACCCTGTTTCGGGGCCCCGAGTTGCTGGCCCCAACGGCGACCTGTACAACGTGTTTGCCTGGGC  
CTTGGACGTCTTGCCAAACGCCTCCGTCCATGCACGTCTTTATCCTGGATTACGACCAATCGCCCGCC  
GGCTGCCGGGACGCCCTGCTGCAACTTACCTCCGGGATGGTCCAGACCCATGTCACCACCCCAGGCTCCA  
TACCGACGATCTGCGACCTGGCGCGCACGTTTGCCCGGGAGATGGGGGAGGCTCACGGAGGTGGTGGAAAG  
TAAGTGTGTACTTTTGGGATTCGCAGCAGTGATCGGATTCCTCGCGATCGCGGAGTCTCTTACCTGTAAC  
ACATGCTCAGTGAGTCTGATTGGAATATGTCTGAATCCCGCAACAGCGACTTGCTCCACCAACACATCCG  
TCTGCACCACAGGAAGAGCCAGTTTCACGGGCGTCTCGGCTTCCTGGGCTTCAACTCCCAGGGCTGCAC  
GGAGGGAGCTCAGTGTAATGGCACCGTGTCCGGGTCCATCCTGGGTGCGTCGTACACGGTCACTCAAACC  
TGCTGCAGCACAACAACCTGCAACCCCGTGACCAGCGGCGCCTCCTACGTCCAGATCTCCGTGAGCGCGG  
CCCTGAGCGCCGCCCTGCTGGCCTGCGTCTGGGGCCAGTCCGTCTACCCCGCTCCAGCACCTGCTTCGTA  
CCCTGCCATCAACACGCGTCTGCGTTCGACCAGGCTGCGCGTTCTCGCGGCCATAGCAACCGACGTACG

GCGTTGCGCCCTCGCCGGCAGCAAGAAGCCACGGAAGTCCGCCGGAGCAGAAAATGCCACGCTACTGC  
GGGTTTATATAGACGGTCCCCACGGGATGGGGAAAACCACCACCACGCAACTGCTGGTGGCCCTGGGTT  
GCGCGACGATATCGTCTACGTACCCGAGCCGATGACTTACTGGCGGGTGTGGGGCTTCCGAGACAATC  
GCGAACATCTACACCACACAACACCGCCTCGACCAGGGTGAGATATCGGCCGGGGACGCGGCGGTGGTAA  
TGACAAGCGCCCAGATAACAATGGGCATGCCTTATGCCGTGACCGACGCCGTTCTGGCTCCTCATATCGG  
GGGGGAGGCTGGGAGCTCACATGCCCGCCCCCGGCCCTCACCATCTTCCTCGACCGCCATCCCATCGCC  
TTCATGCTGTGCTACCCGGCCGCGCGGTACCTTATGGGCAGCATGACCCCCAGGCCGTGCTGGCGTTCCG  
TGGCCCTCATCCCGCCGACCTTGCCCGGCACAAACATCGTGTTGGGGCCCTTCCGGAGGACAGACACAT  
CGACCGCCTGGCCAAACGCCAGCGCCCCGGTGAGCGGCTTGACCTGGCTATGCTGGCCGCGATTGCGCCG  
GTTTACGGGCTACTTGCCAATACGGTGCGGTATCTGCAGTGCGGCGGGTCGTGGCGGGAGGATTGGGGAC  
AGCTTTCGGGGACGTGA

1. Petersen, E.D. et al. Bioluminescent Genetically Encoded Glutamate Indicators for Molecular Imaging of Neuronal Activity. *ACS Synthetic Biology* (2023).
2. Manly, B.F.J. Randomization Tests, 4th Edition by Eugene S. Edgington, Patrick Onghena.
